# Supplementary material
Source: PubMed Central journal article supplement (PMC7926262)
Supplement: EMBR-22-e51519-s001.pdf [file EMBR-22-e51519-s001.pdf]

## Expanded View Figures

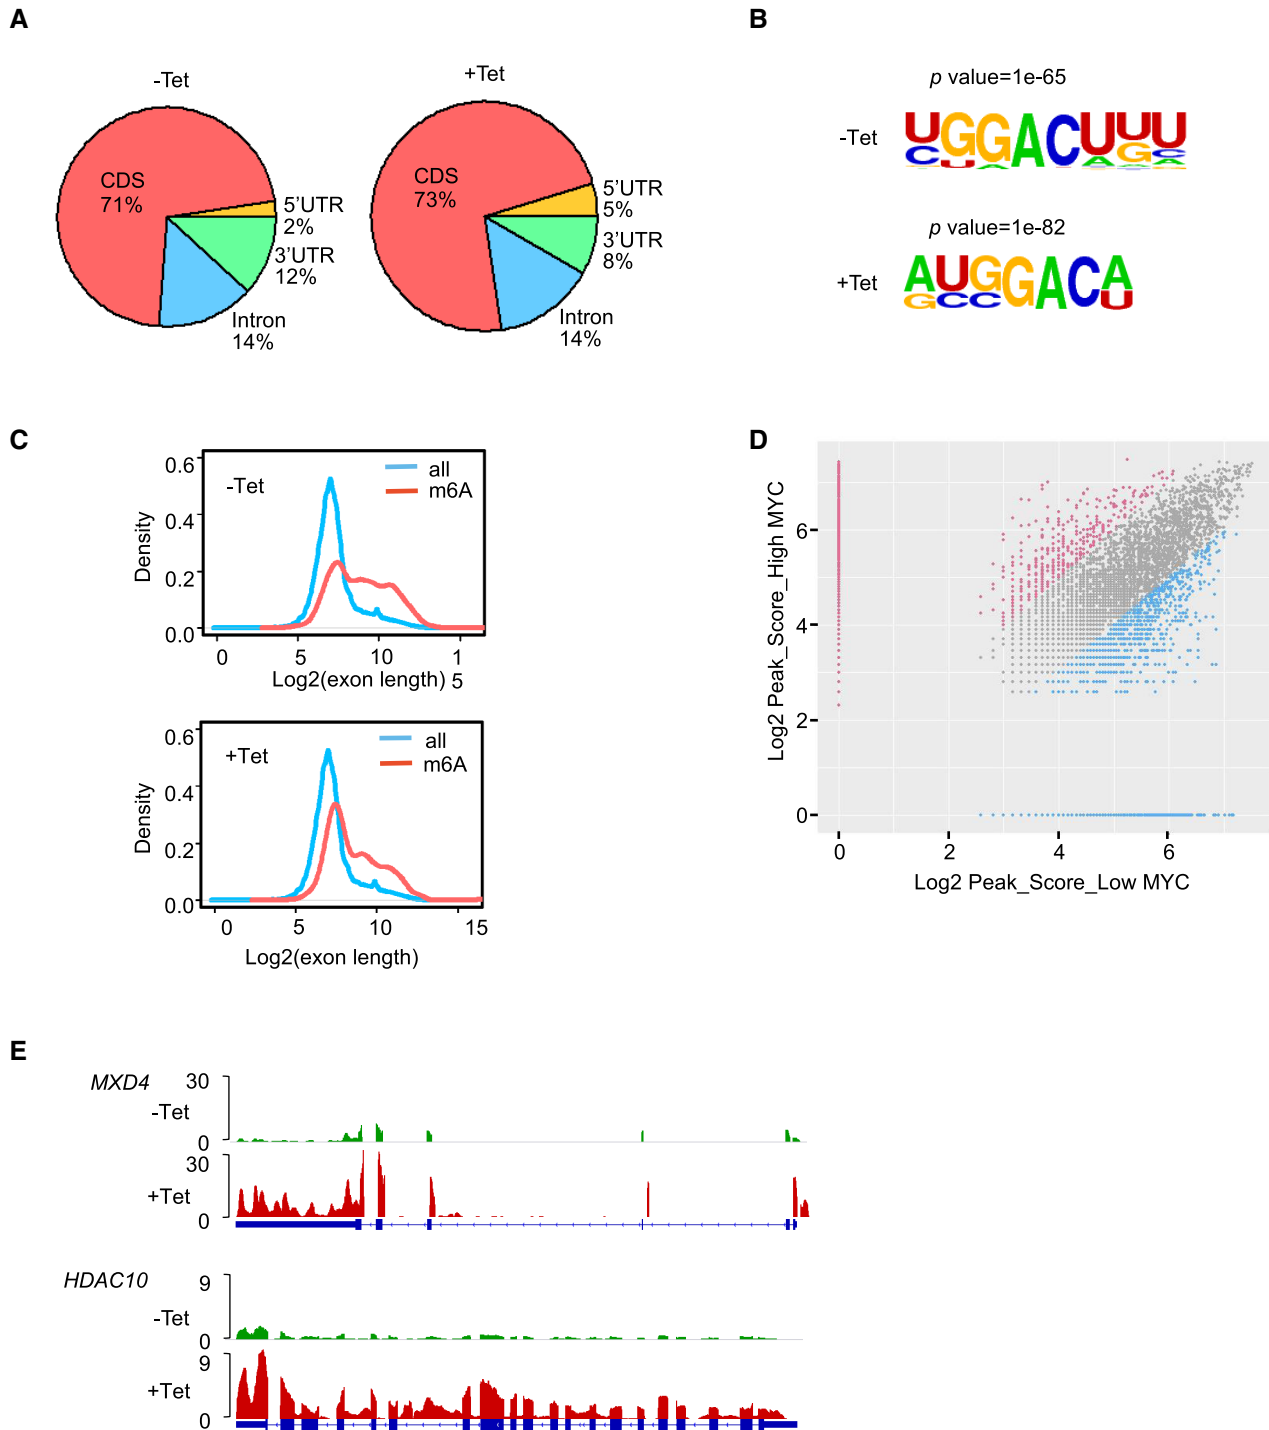

Figure EV1.

**Figure EV1. MeRIP analyses show that MYC down-regulates m<sup>6</sup>A levels of mRNA.**

- A Pie chart depicting the fraction of m<sup>6</sup>A peaks in four transcript segments in P493-6 cells treated with Tet for 0 h or 72 h.
- B Sequence motif identified within m<sup>6</sup>A peaks by HOMER database.
- C Distribution of m<sup>6</sup>A sites along the length of mRNA transcripts.
- D Scatter plots showing the m<sup>6</sup>A enrichment in mRNA of high MYC and low MYC samples. m<sup>6</sup>A-containing mRNA with significantly increased and decreased peak enrichment is highlighted in red and green, respectively (chi-square test,  $P < 0.05$ ).
- E IGV graph showing location of m<sup>6</sup>A peaks on representative genes.

**Figure EV2. MYC and m<sup>6</sup>A down-regulate protein expression but not mRNA expression of SPI1 and PHF12.**

- A, B Western blot analysis for protein levels of MYC, SPI1, and PHF12 in P493-6 cells (A) or Raji cells (B) that treated with the cycloleucine for 0, 24, 48, and 72 h. HPRT1 and  $\beta$ -actin serve as negative control and loading control, respectively. Data are representative of at least three independent experiments.
- C RT-qPCR analysis of the mRNA level of *SPI1* and *PHF12* in P493-6 cells treated with cycloleucine for 0, 24, 48, and 72 h. Data were presented as mean ( $\pm$ SD),  $n = 3$  biological replicates.
- D RT-qPCR analysis of the m<sup>6</sup>A levels of MRGs (*SPI1* and *PHF12*) in P493-6 cells treated with cycloleucine for 0 h or 24 h. *HPRT1* serves as negative control. Data are mean ( $\pm$ SD),  $n = 3$  biological replicates. \*\*\* $P < 0.001$  relative to corresponding 0 h group (Student's *t*-test).
- E RT-qPCR analysis of the mRNA level of *SPI1* and *PHF12* in P493-6 cells treated with Tet for 0 h or 24 h. Data were presented as mean ( $\pm$ SD),  $n = 3$  biological replicates (Student's *t*-test).
- F Western blot analysis for protein levels of MYC and MRGs (*SPI1* and *PHF12*) in P493-6 cells treated with Tet, cycloleucine, or both. HPRT1 and  $\beta$ -actin serve as negative and loading controls, respectively. Data are representative of at least three independent experiments.
- G IGV showing the locations of m<sup>6</sup>A peaks on *CDKN1A* and *CDKN2B*.
- H RT-qPCR analysis of the mRNA levels of *CDKN1A* and *CDKN2B* in P493-6 cells treated with Tet for 0 h or 24 h; data were presented as mean ( $\pm$ SD),  $n = 3$  biological replicates, \* $P < 0.05$  relative to corresponding -Tet group (Student's *t*-test).

Source data are available online for this figure.

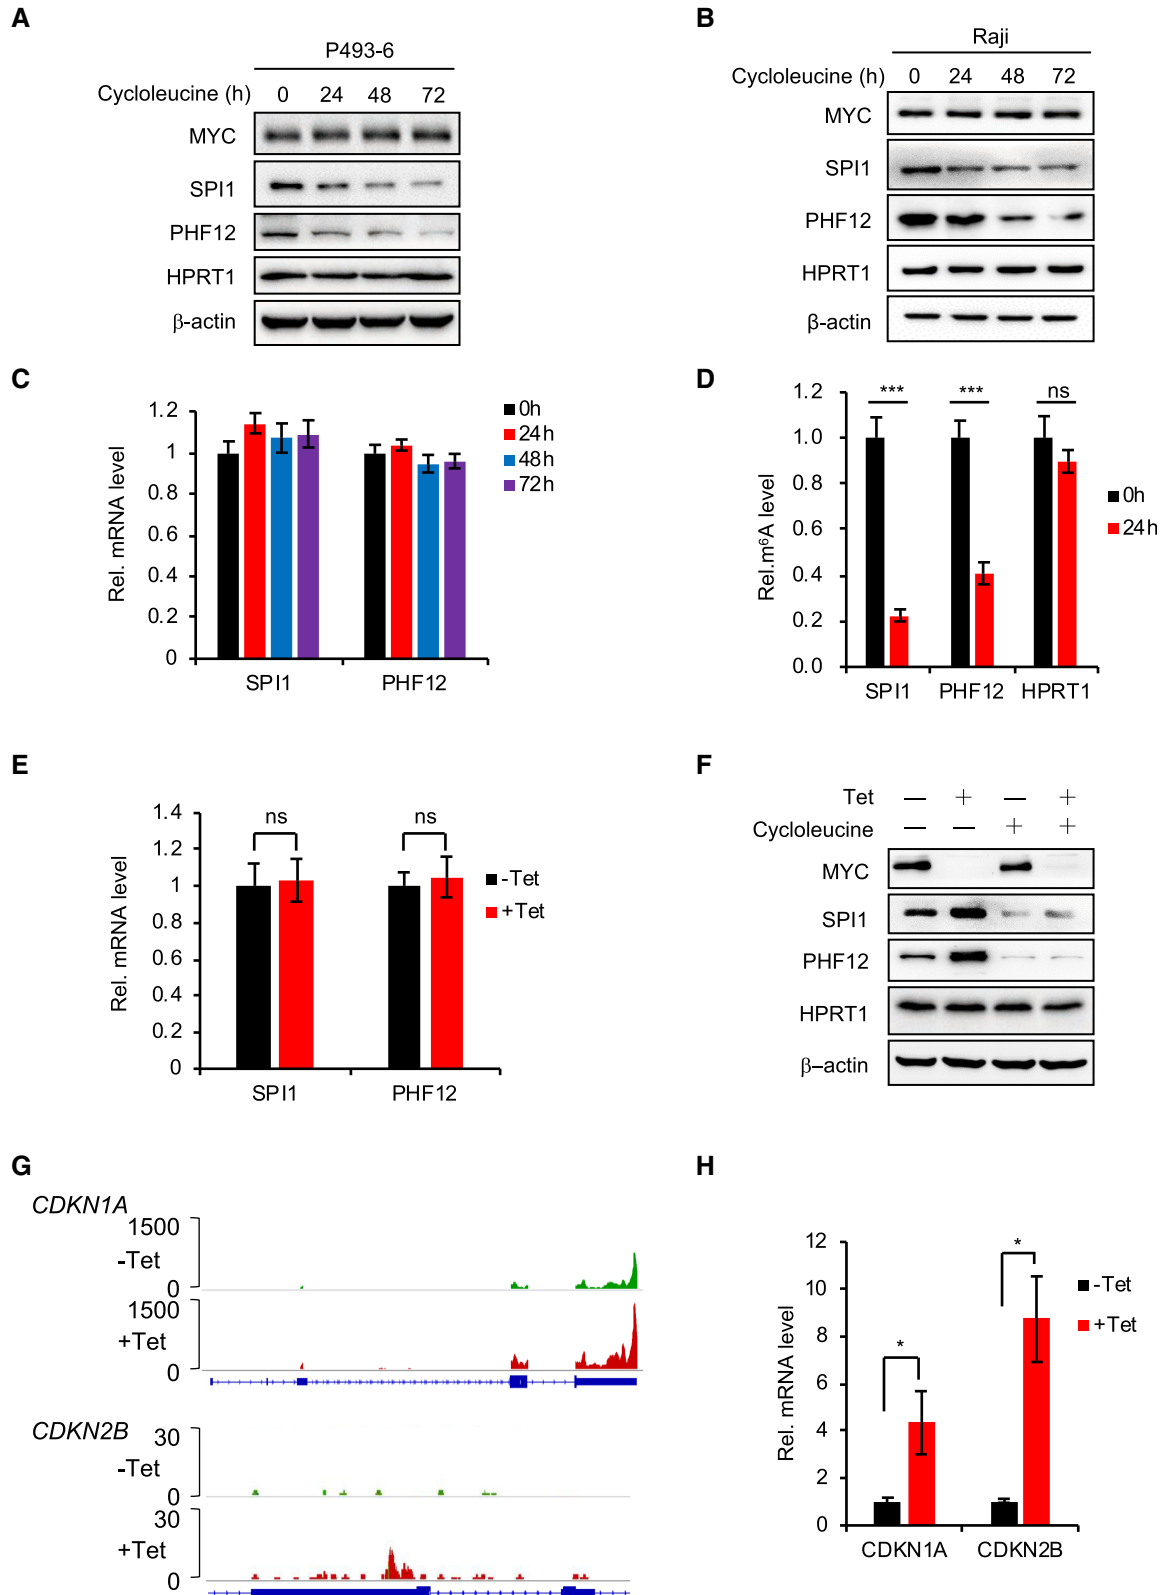

Figure EV2.

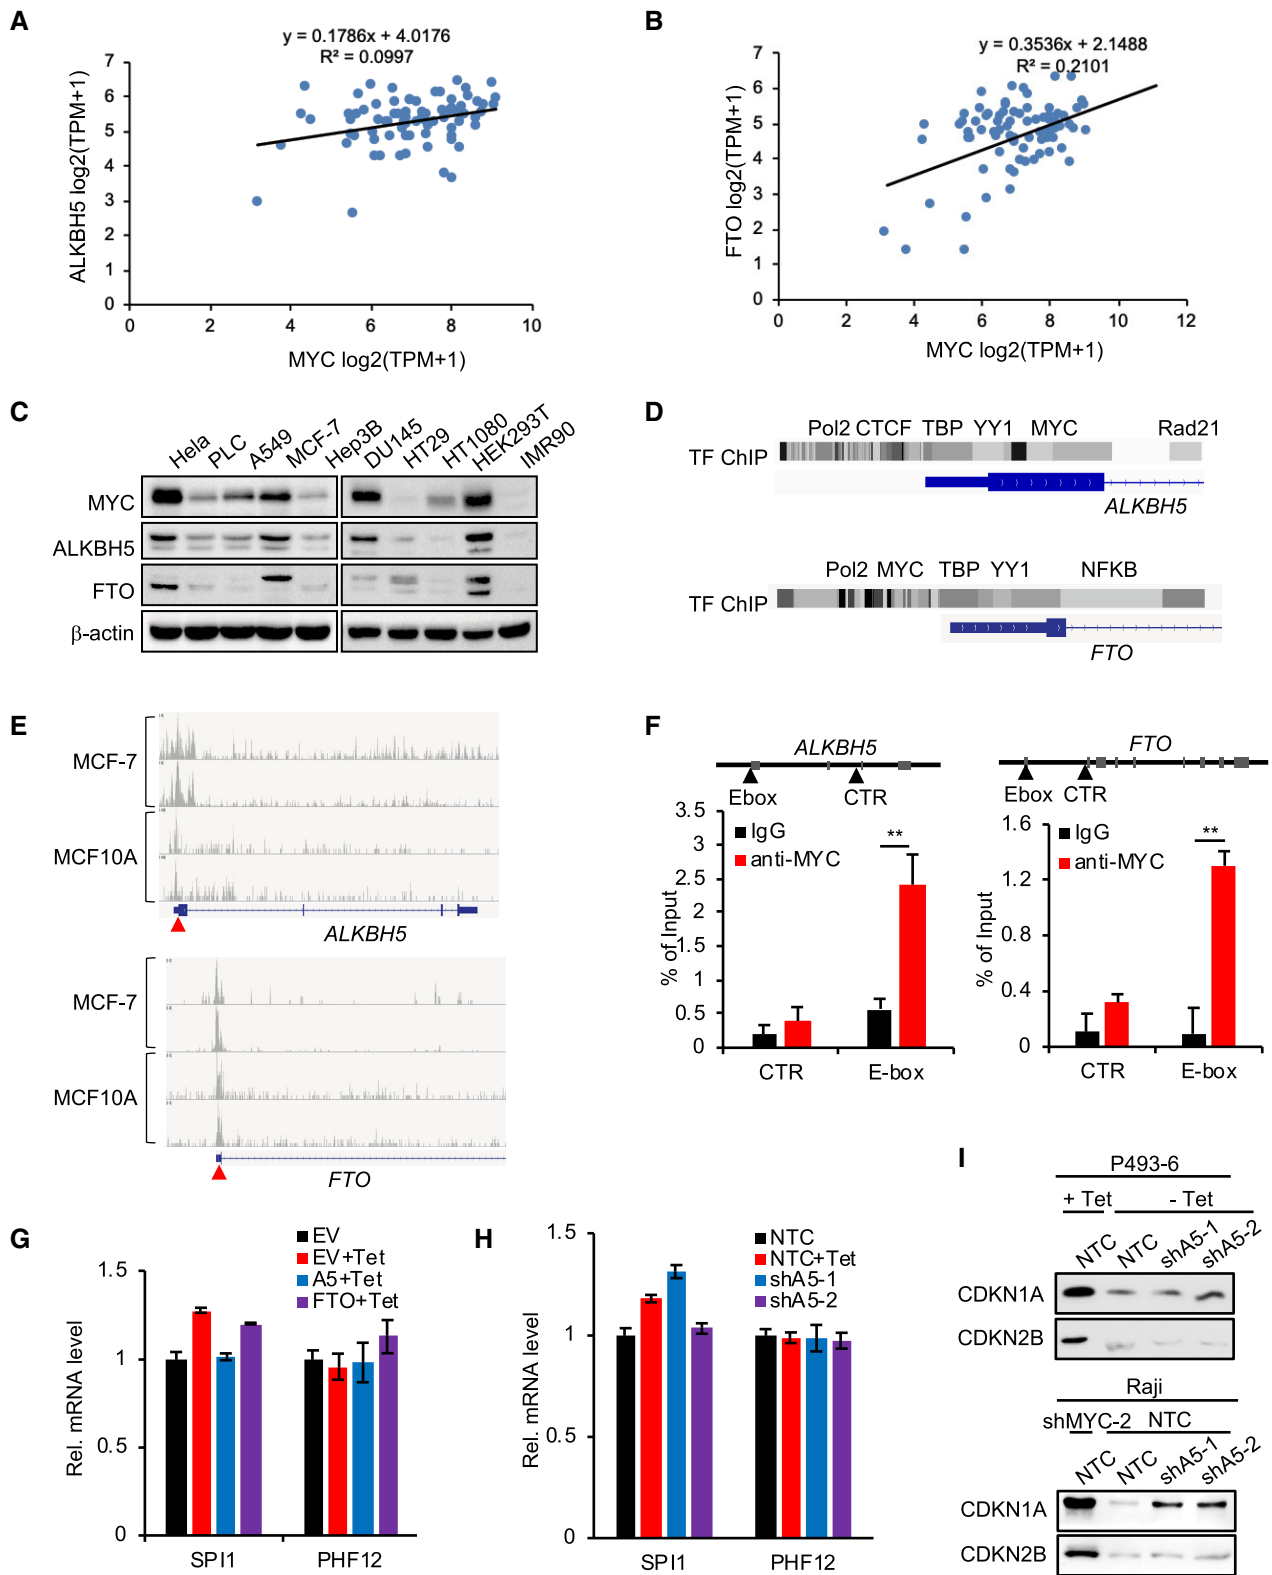

Figure EV3.

**Figure EV3. MYC regulates demethylases ALKBH5 and FTO, and ALKBH5 inhibits the protein expression of SPI1 and PHF12.**

- A, B Analyses of the co-expression of MYC and ALKBH5 (A) or MYC and FTO (B) in 78 lymphocyte cell lines from CCLE. Linregress *P* value for (A) is 4.87E-3 and for (B) is 2.44E-5.
- C Western blot analysis for protein levels of MYC, ALKBH5, and FTO in ten different human cell lines.  $\beta$ -actin serves as loading controls. Western blot data are representative of at least three independent experiments.
- D Analyses of ALKBH5 and FTO promoter in ENCODE transcription factor (TF) ChIP datasets (Data ref: Furey *et al*, 2011; Data ref: Snyder *et al*, 2011).
- E IGV graph showing location of MYC-binding peaks on ALKBH5 and FTO from published ChIP-seq datasets (Data ref: Furey *et al*, 2011; Data ref: Snyder *et al*, 2011). Red triangle indicates the binding peak.
- F CHIP experiment was performed in P493-6 cells using IgG or anti-MYC antibody. The occupancy of potential E-Box in ALKBH5 and FTO genes by MYC was determined by RT-qPCR. Control (CTR) primer sets were also included. Data were presented as mean ( $\pm$ SD), *n* = 3 biological replicates. \*\**P* < 0.01 as compared to corresponding IgG group (Student's *t*-test).
- G RT-qPCR analysis of the mRNA level of *SPI1* and *PHF12* in P493-6 cells that overexpressed EV, ALKBH5, or FTO and were then treated with Tet or not. RT-qPCR data were presented as mean ( $\pm$ SD), *n* = 3 biological replicates.
- H RT-qPCR analysis of the mRNA level of *SPI1* and *PHF12* in P493-6 cells that expressed NTC or *ALKBH5* shRNAs and were then treated with Tet or not. RT-qPCR data were presented as mean ( $\pm$ SD), *n* = 3 biological replicates.
- I Western blot analysis for protein levels of CDKN1A and CDKN2B in Fig 2I and J samples that P493-6 cells expressing NTC or *ALKBH5* shRNAs and were then treated with or without Tet or in Raji cells expressing NTC or *ALKBH5* shRNAs with or without MYC knockdown.

Source data are available online for this figure.

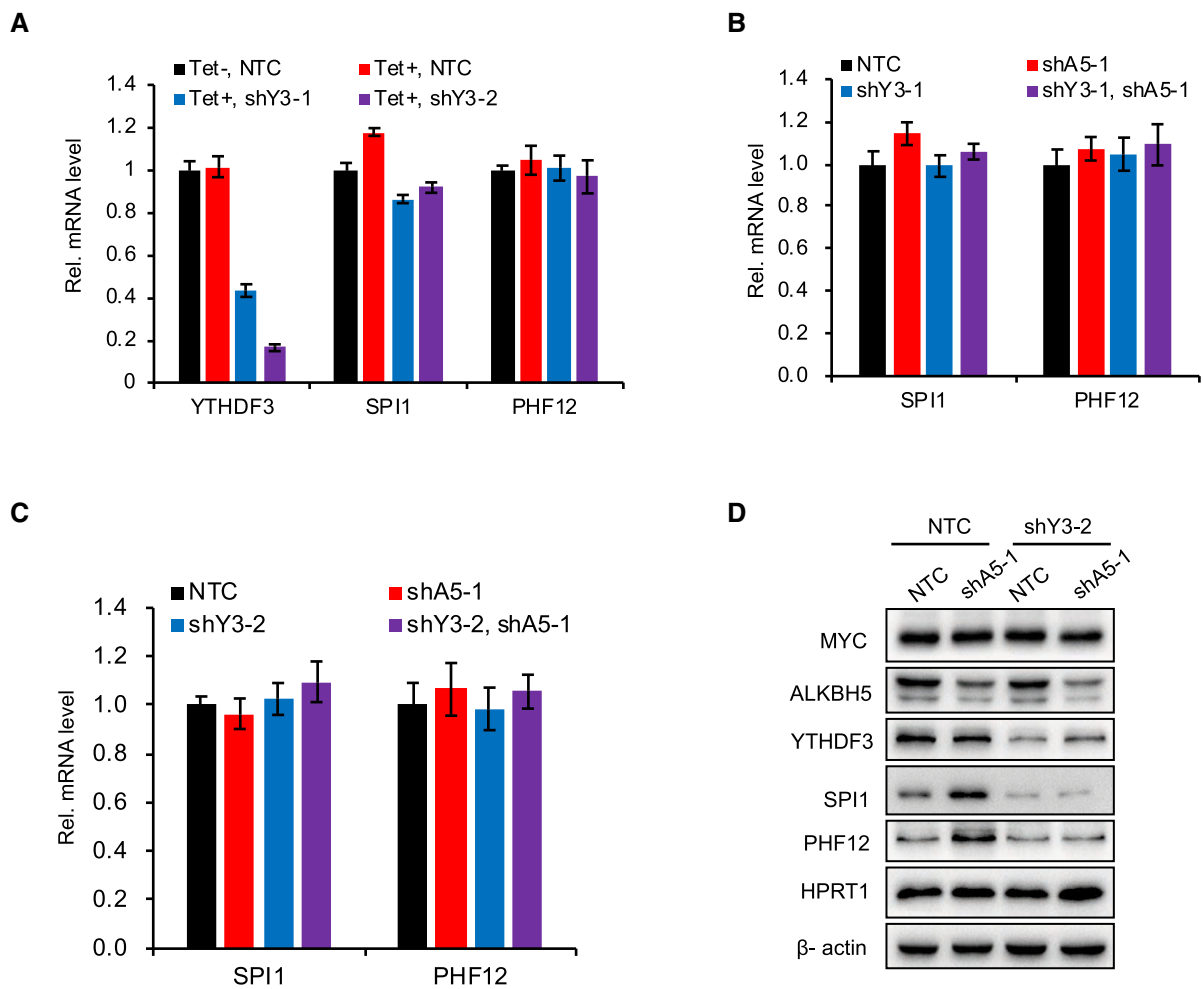

Figure EV4.

**Figure EV4. YTHDF3 does not regulate mRNA expression but promotes mRNA translation.**

- A RT-qPCR analysis of the mRNA level of *SPI1* and *PHF12* in P493-6 cells that expressed NTC or *YTHDF3* shRNAs and were then treated with Tet or not. Data were presented as mean ( $\pm$ SD),  $n = 3$  biological replicates.
- B, C RT-qPCR assay for mRNA levels of *SPI1* and *PHF12* in P493-6 cells that expressed NTC, *ALKBH5* shRNA, or *YTHDF3* shRNA, or co-expressed *ALKBH5* as well as *YTHDF3* shRNAs. Data were presented as mean ( $\pm$ SD),  $n = 3$  biological replicates.
- D Western blot analysis for protein levels in P493-6 cells that expressed NTC, or *ALKBH5* shRNA, or *YTHDF3* shRNA. HPRT1 and  $\beta$ -actin serve as negative and loading controls, respectively. Western blot data are representative of at least three independent experiments.

Source data are available online for this figure.

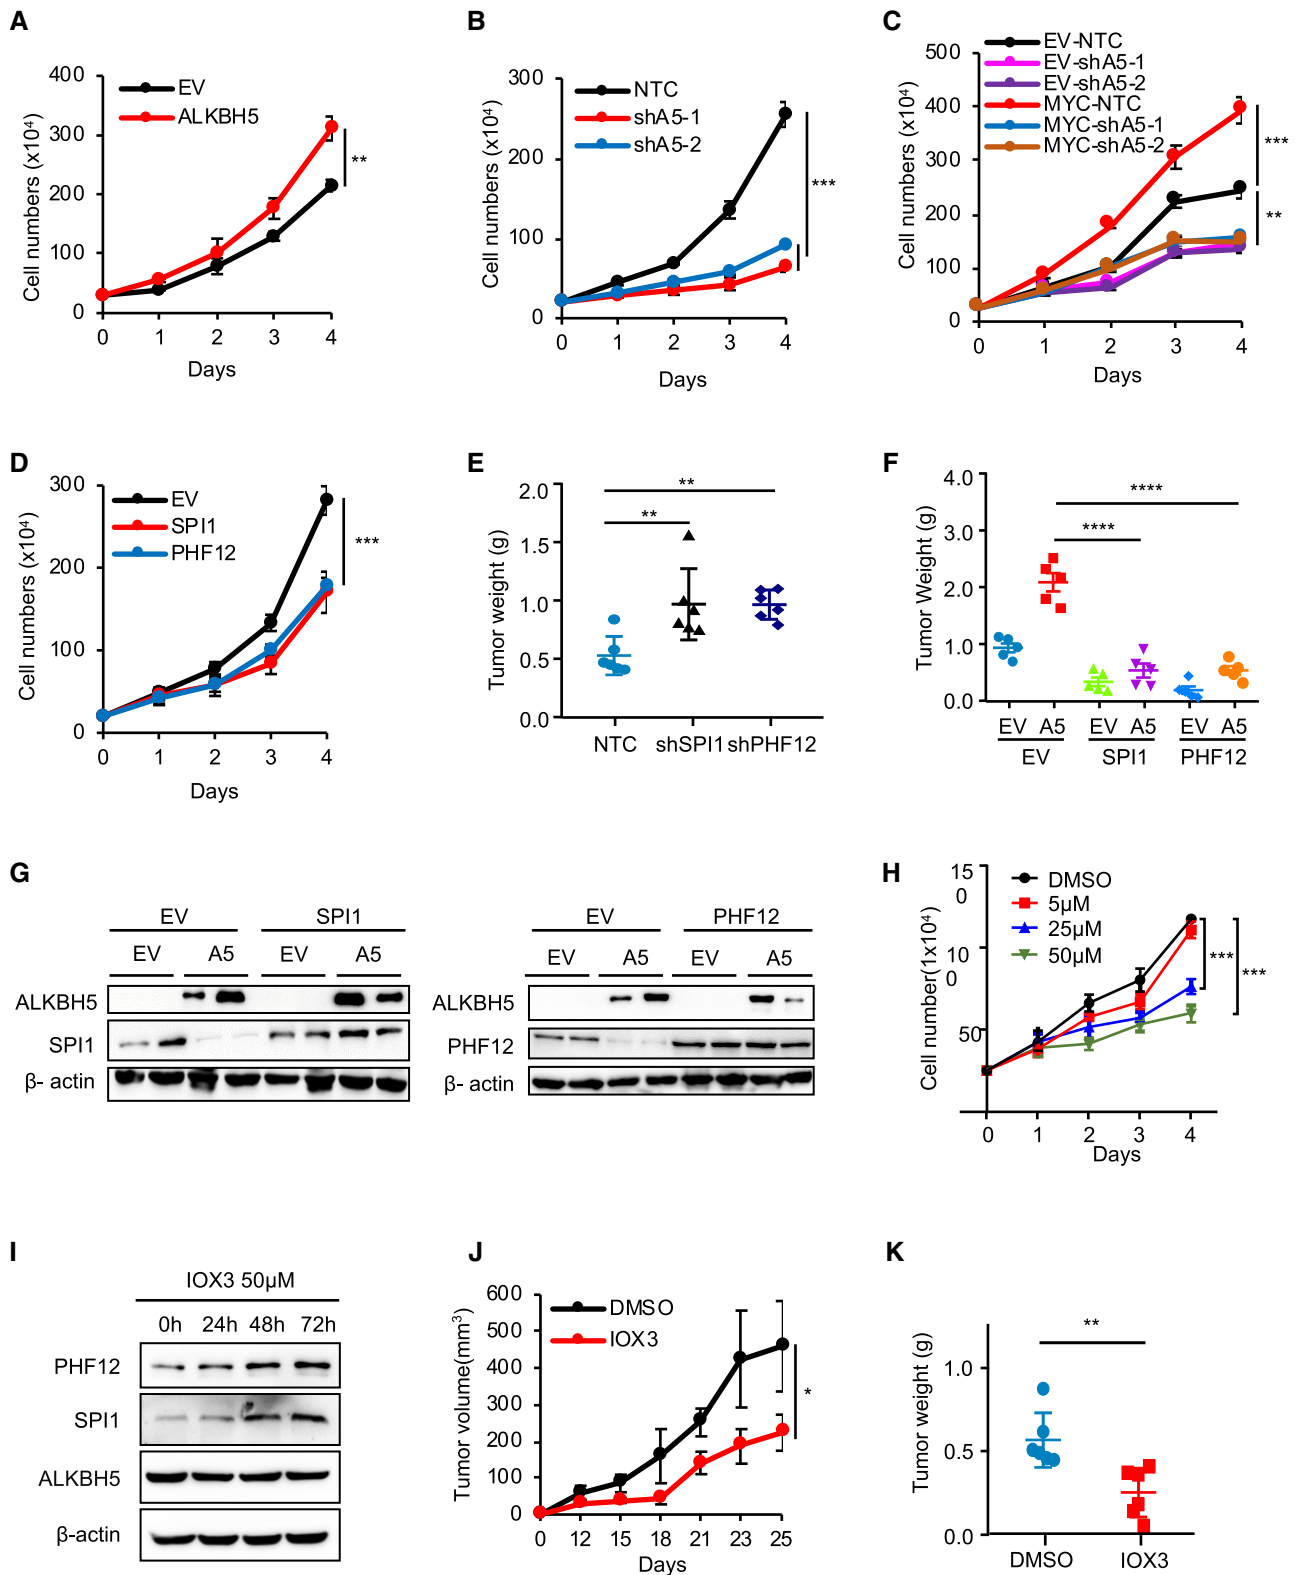

Figure EV5.

**Figure EV5. The MYC-ALKBH5-m<sup>6</sup>A-SPI1/PHF12 axis is critical for cancer progression.**

- A, B Trypan blue counting was used to analyze growth curves for P493-6 cells overexpressing ALKBH5 (A) and *ALKBH5* shRNAs (B). \*\**P* < 0.01 and \*\*\**P* < 0.001 as compared between indicated groups (mean ± SD, *n* = 4 biological replicates, Student's *t*-test).
- C Trypan blue counting was used to analyze growth curves for EV- or MYC-expressing Raji cells that further infected with sh*ALKBH5*. \*\**P* < 0.01 and \*\*\**P* < 0.001 as compared between indicated groups (mean ± SD, *n* = 3 biological replicates, Student's *t*-test).
- D Trypan blue counting was used to analyze growth curves for P493-6 cells overexpressing MRGs (SPI1 or PHF12). \*\*\**P* < 0.001 as compared between indicated groups (mean ± SD, *n* = 3 biological replicates, Student's *t*-test).
- E, F Weight of tumors collected at the end of the experiment in Fig 4G (E) or in Fig 4I (F). Data are presented as mean (±SEM), *n* = 5 for each group. \*\**P* < 0.01 or \*\*\*\**P* < 0.0001 as compared between indicated groups (Student's *t*-test).
- G Western blot analysis for protein levels of ALKBH5, SPI1, and PHF12 from xenograft tumors. β-actin serves as loading controls.
- H Cell growth curves for P493-6 cells that treated with different doses of IOX3. \*\*\**P* < 0.001 as compared to between indicated groups (mean ± SD, *n* = 3 biological replicates, Student's *t*-test).
- I Western blot analysis for protein levels of ALKBH5, SPI1, and PHF12 in P493-6 cells treated with the ALKBH5 inhibitor IOX3 for 0, 24, 48, and 72 h. β-actin serves as loading control. The Western blot data are representative of at least three independent experiments.
- J, K P493-6 cells were injected subcutaneously into nude mice (*n* = 5 for each group). Mice were received every other day either IOX3 or DMSO (5% DMSO/H<sub>2</sub>O) by intragastric administration from 12 days postinjection (J). Tumor weights were measured at the end of the experiment (day 25) (K). Data are presented as mean (±SEM). \**P* < 0.05 and \*\*\**P* < 0.001 as compared between indicated groups (Student's *t*-test).

Source data are available online for this figure.
