# Supplementary material
Source: PubMed Central journal article supplement (PMC7926262)

## Source data for Figure 1

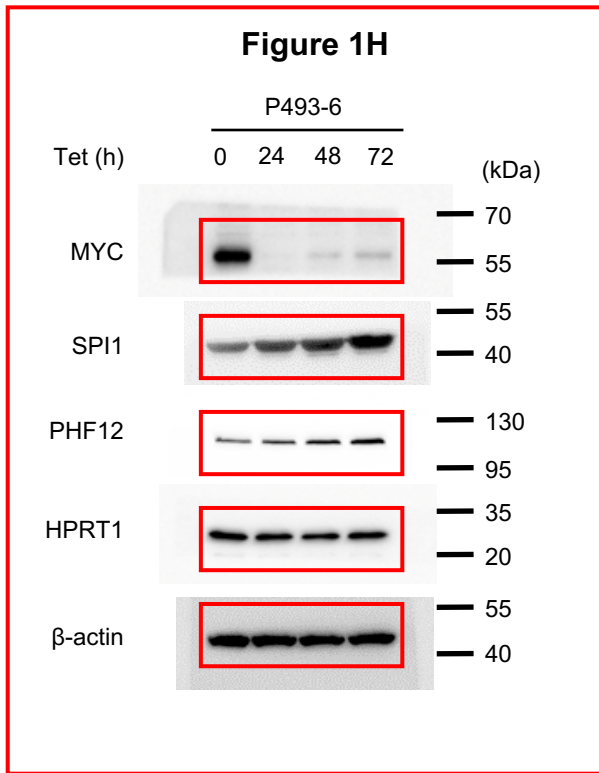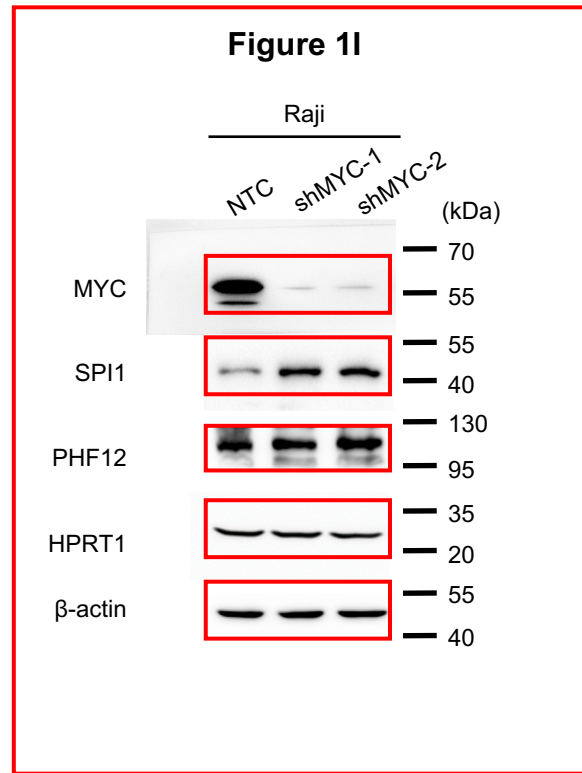

Supplement: EMBR-22-e51519-s004.pdf [file EMBR-22-e51519-s004.pdf]

## Source data for Figure 2

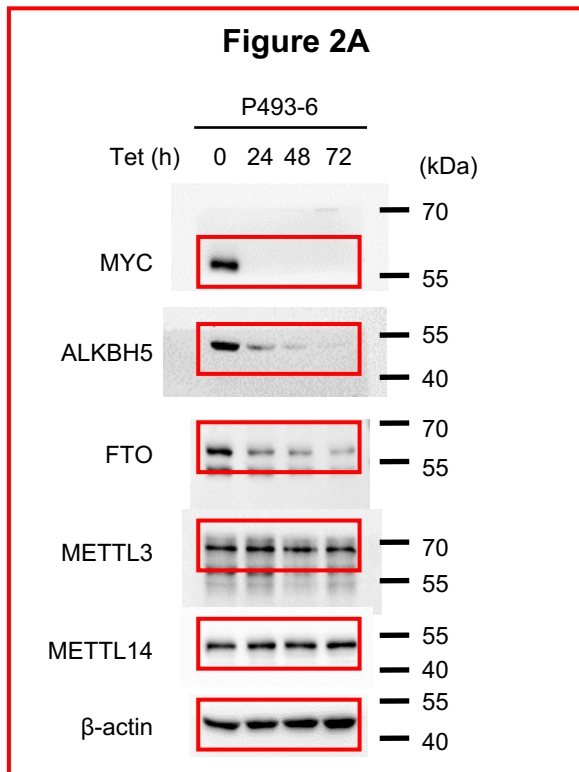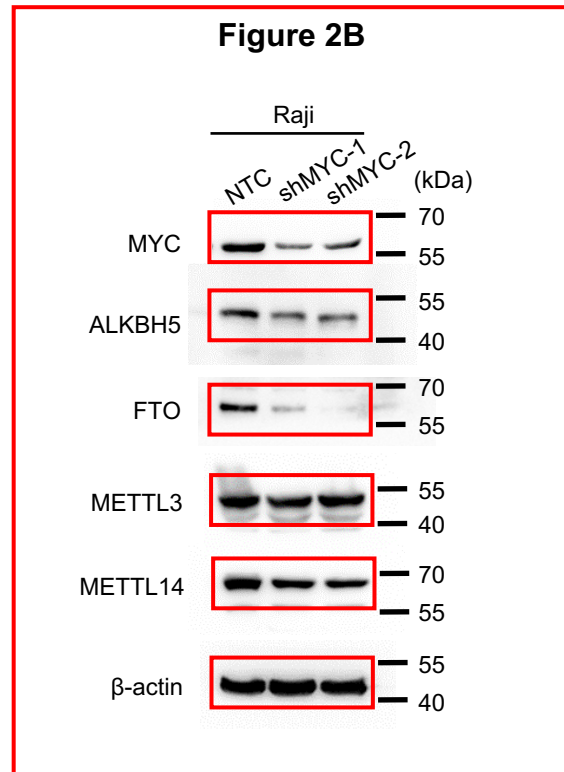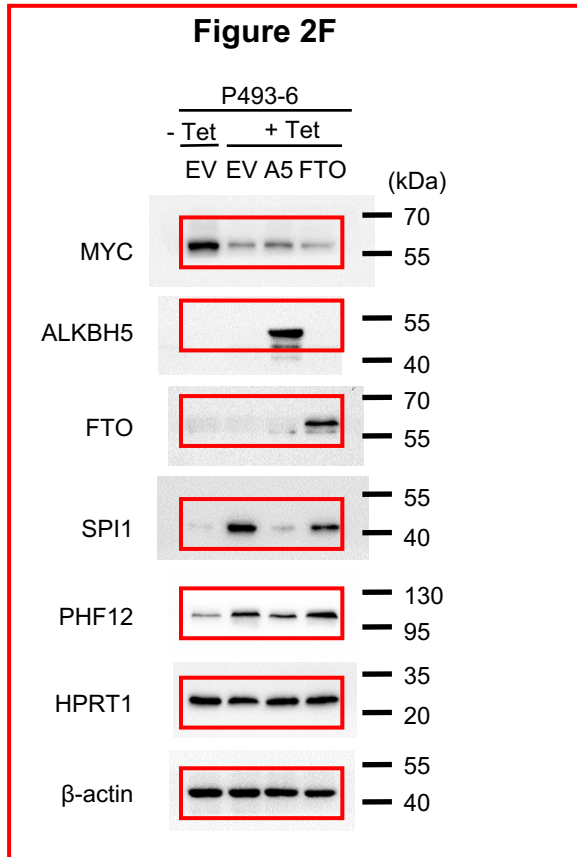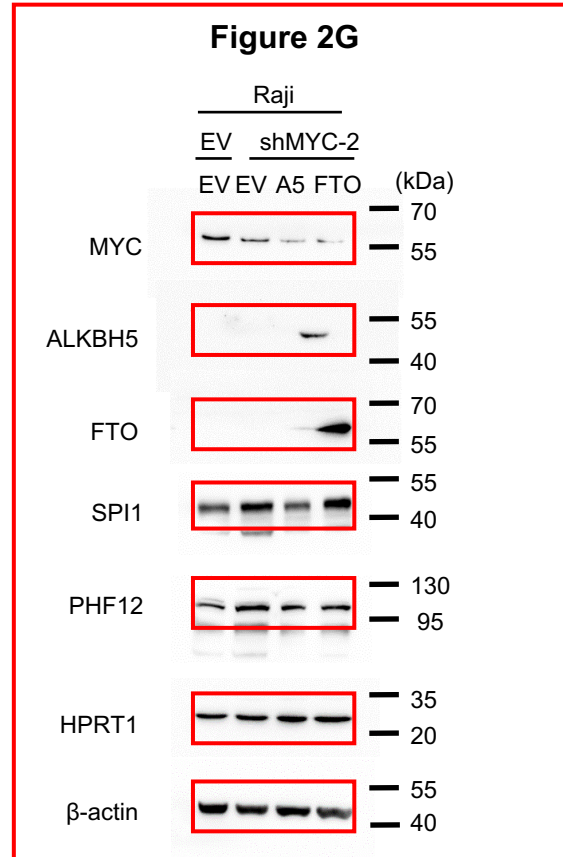

## Source data for Figure 2

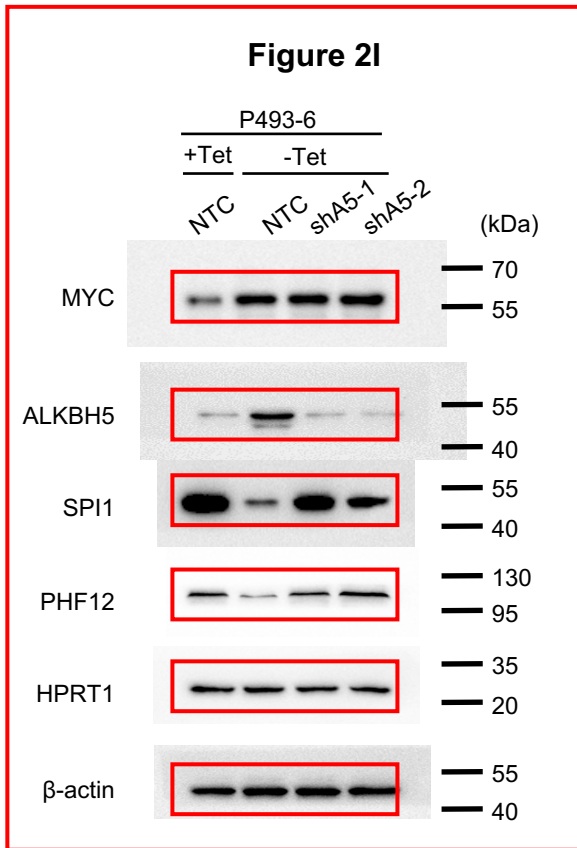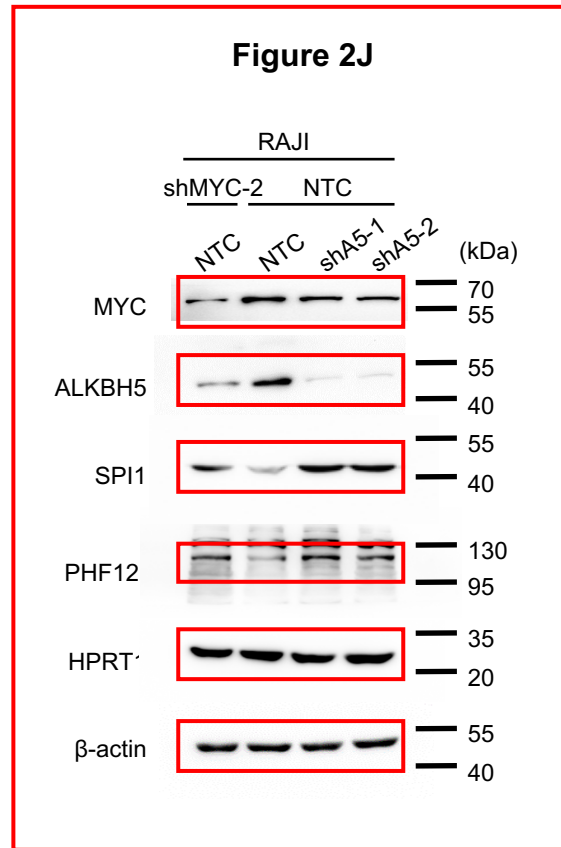

Supplement: EMBR-22-e51519-s005.pdf [file EMBR-22-e51519-s005.pdf]

### Source data for Figure 3

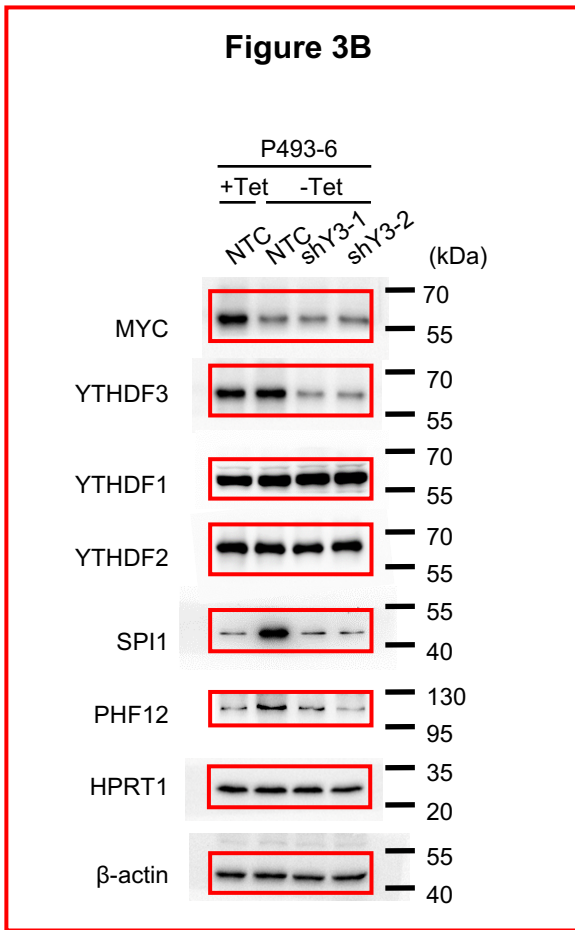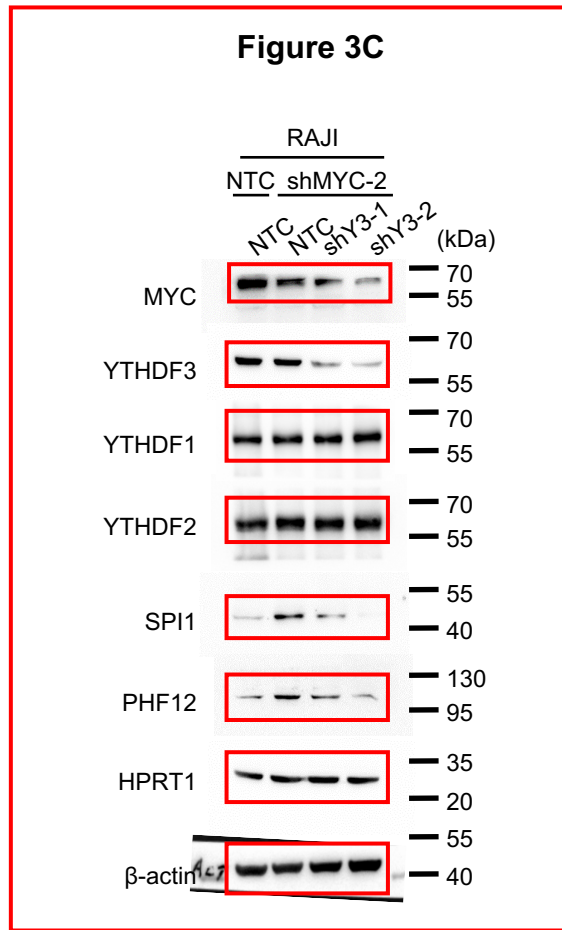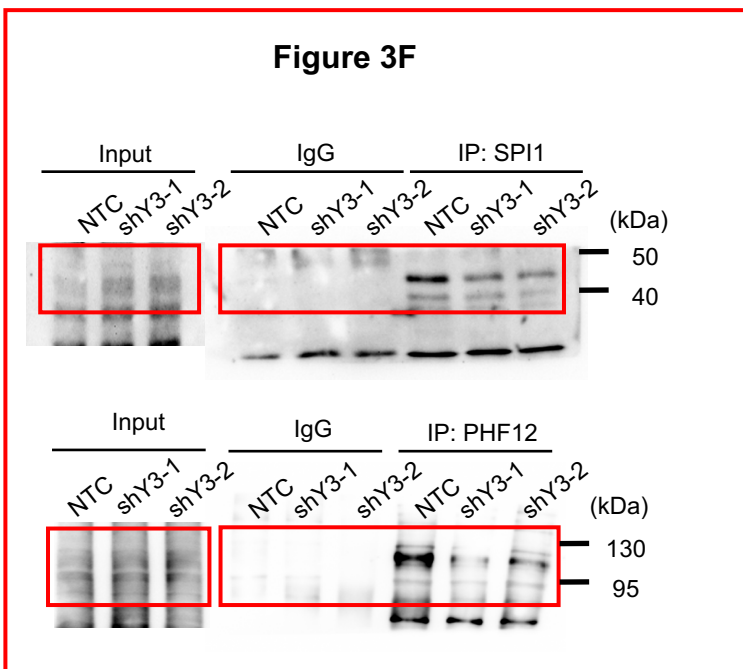

### Source data for Figure 3

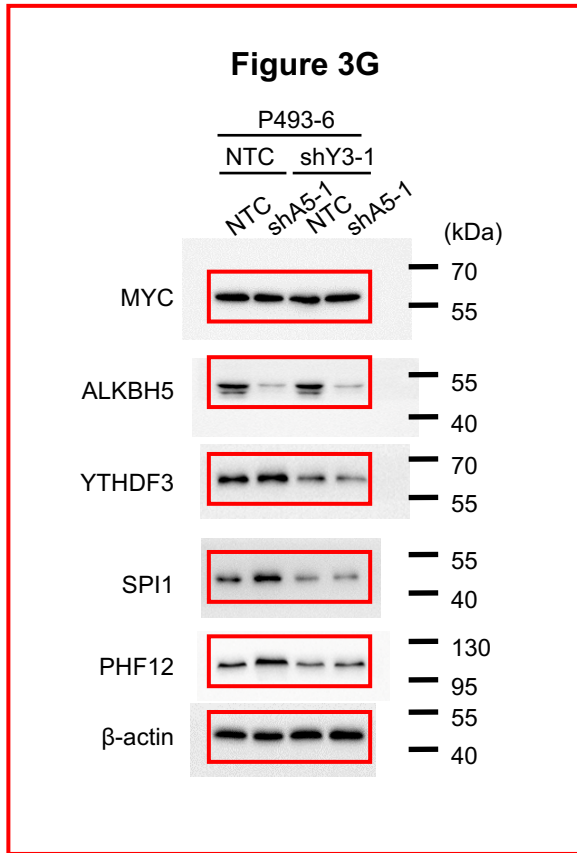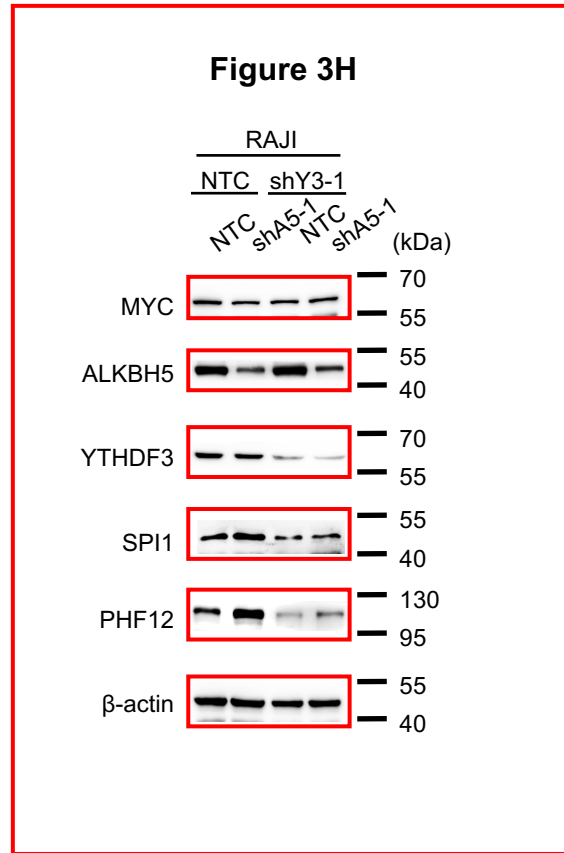

Supplement: EMBR-22-e51519-s006.pdf [file EMBR-22-e51519-s006.pdf]
